# Supplementary material
Source: PubMed Central journal article supplement (PMC4594762)

# Association between history of tuberculosis and FEV1/FVC

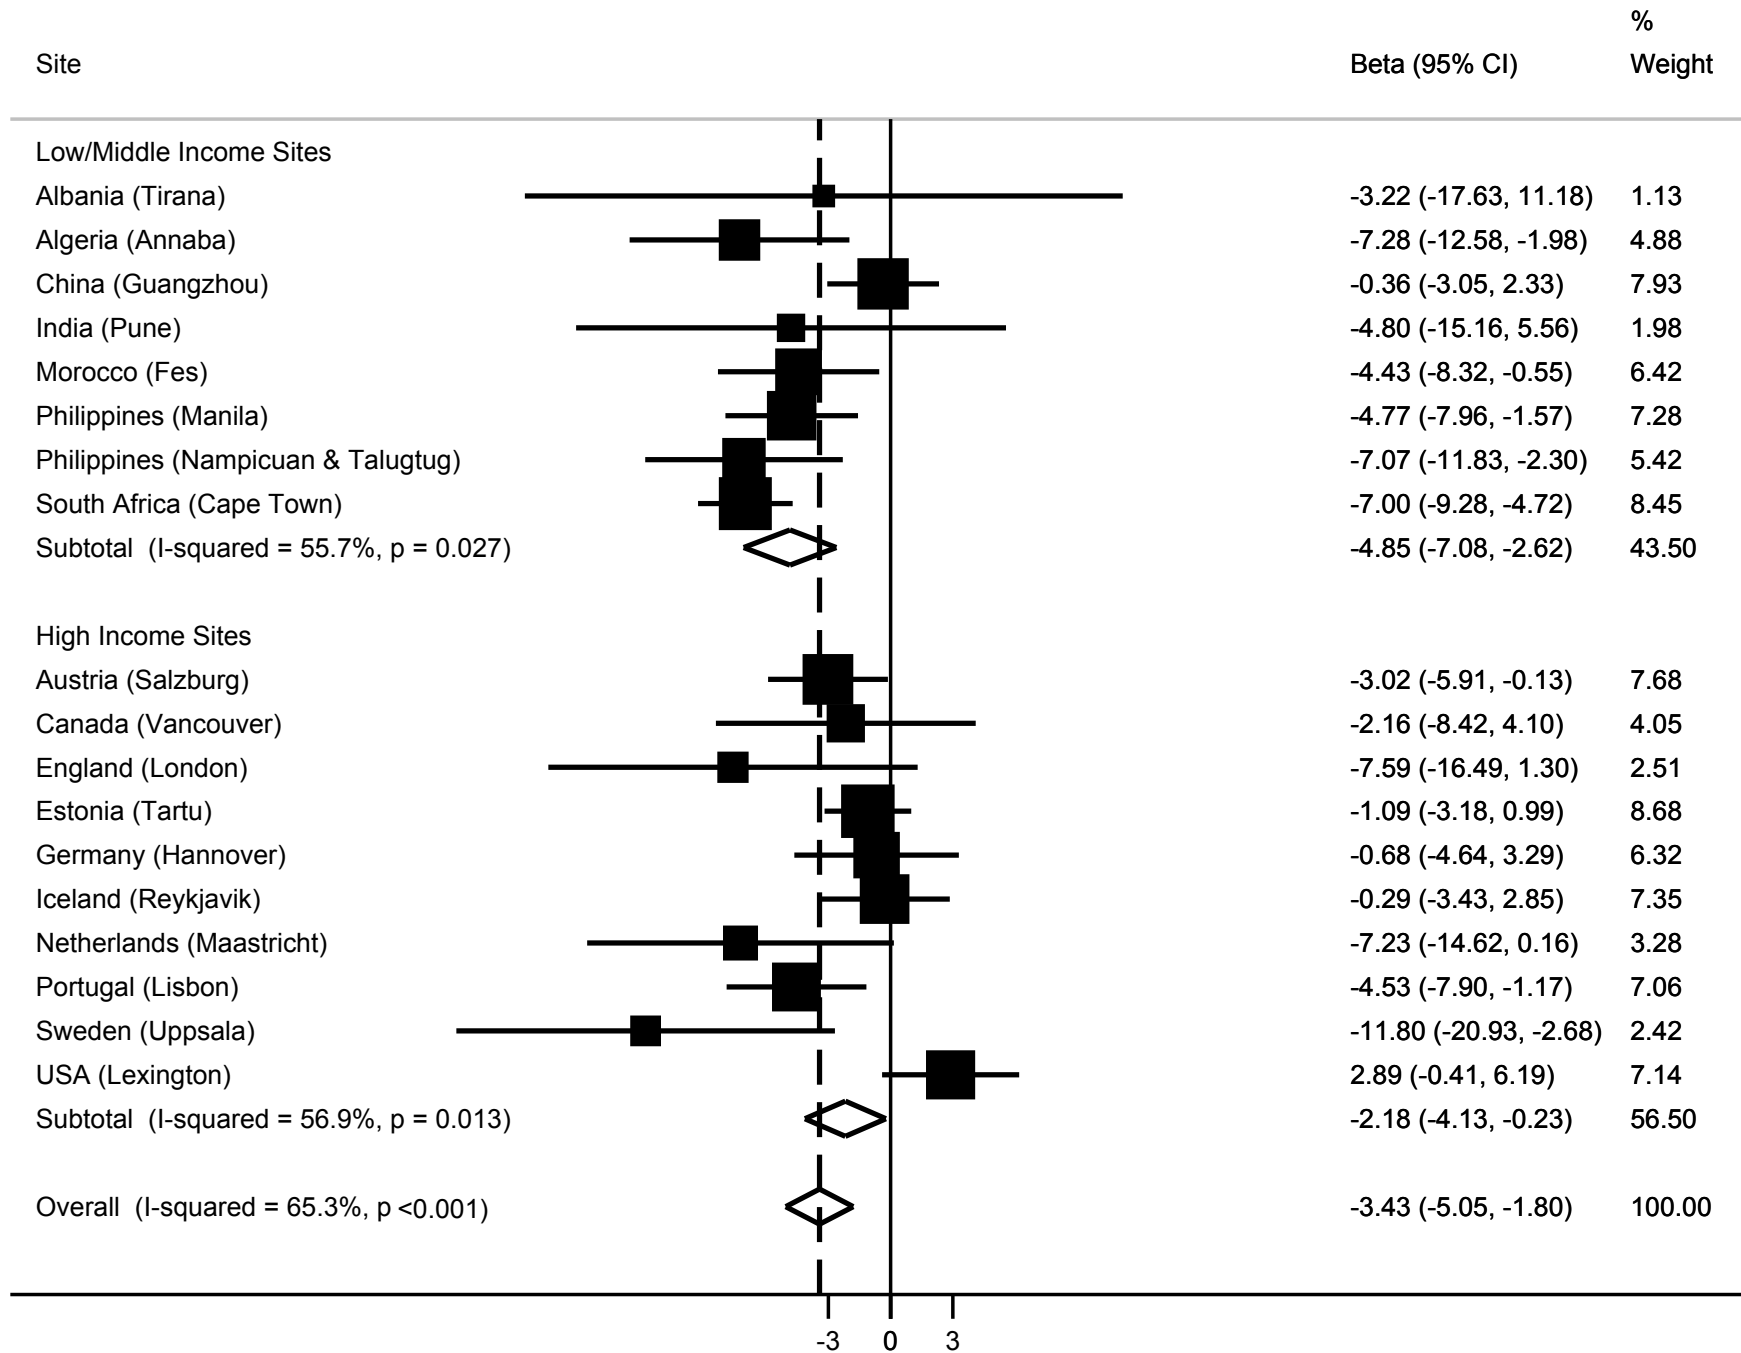

Supplement: NIHMS63343-supplement-Supplementary_figure_1.pdf [file NIHMS63343-supplement-Supplementary_figure_1.pdf]

# Association between history of tuberculosis and FVC

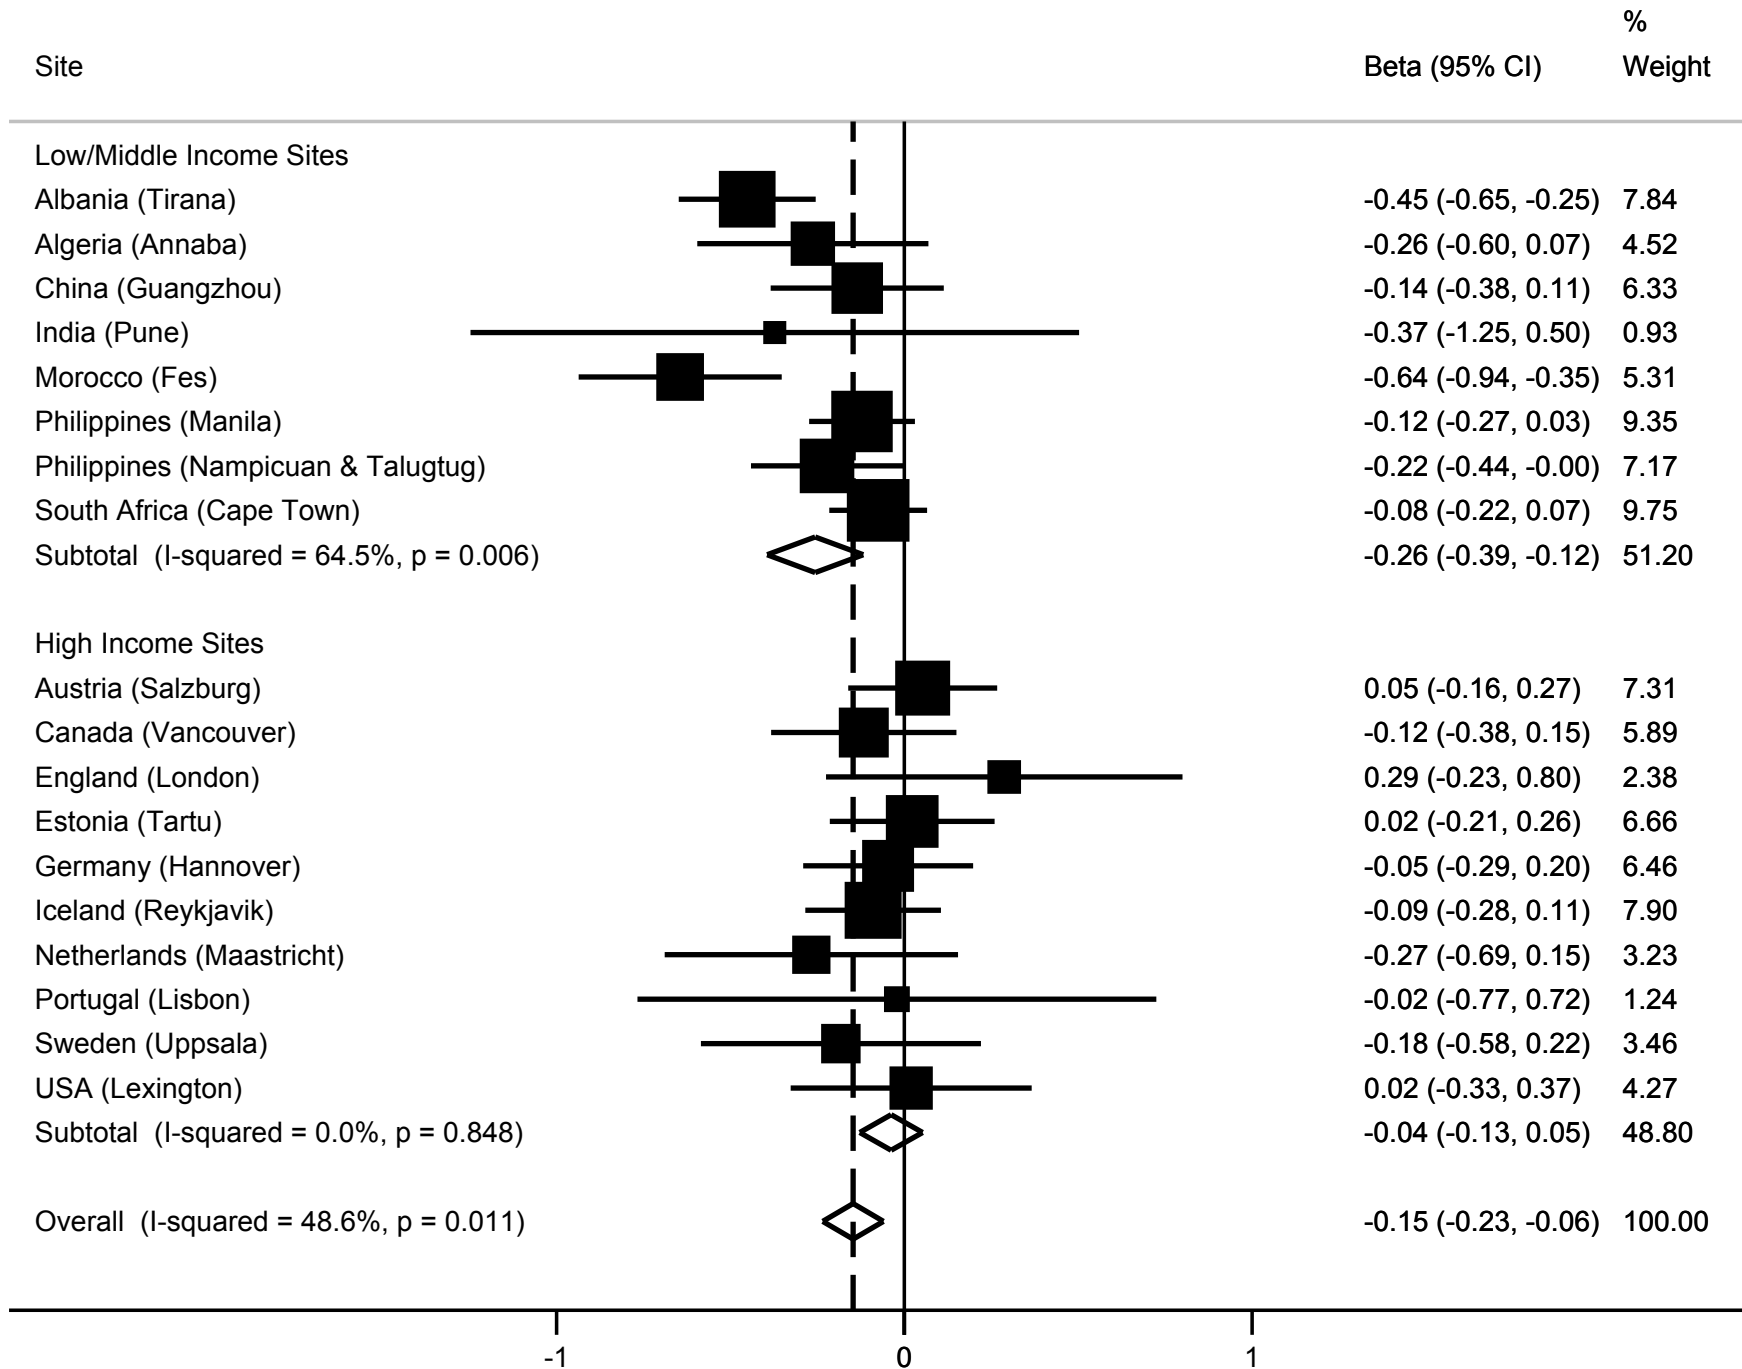

Supplement: NIHMS63343-supplement-Supplementary_figure_2.pdf [file NIHMS63343-supplement-Supplementary_figure_2.pdf]

# Association between history of tuberculosis and airflow obstruction (Cooperation rate > 60%)

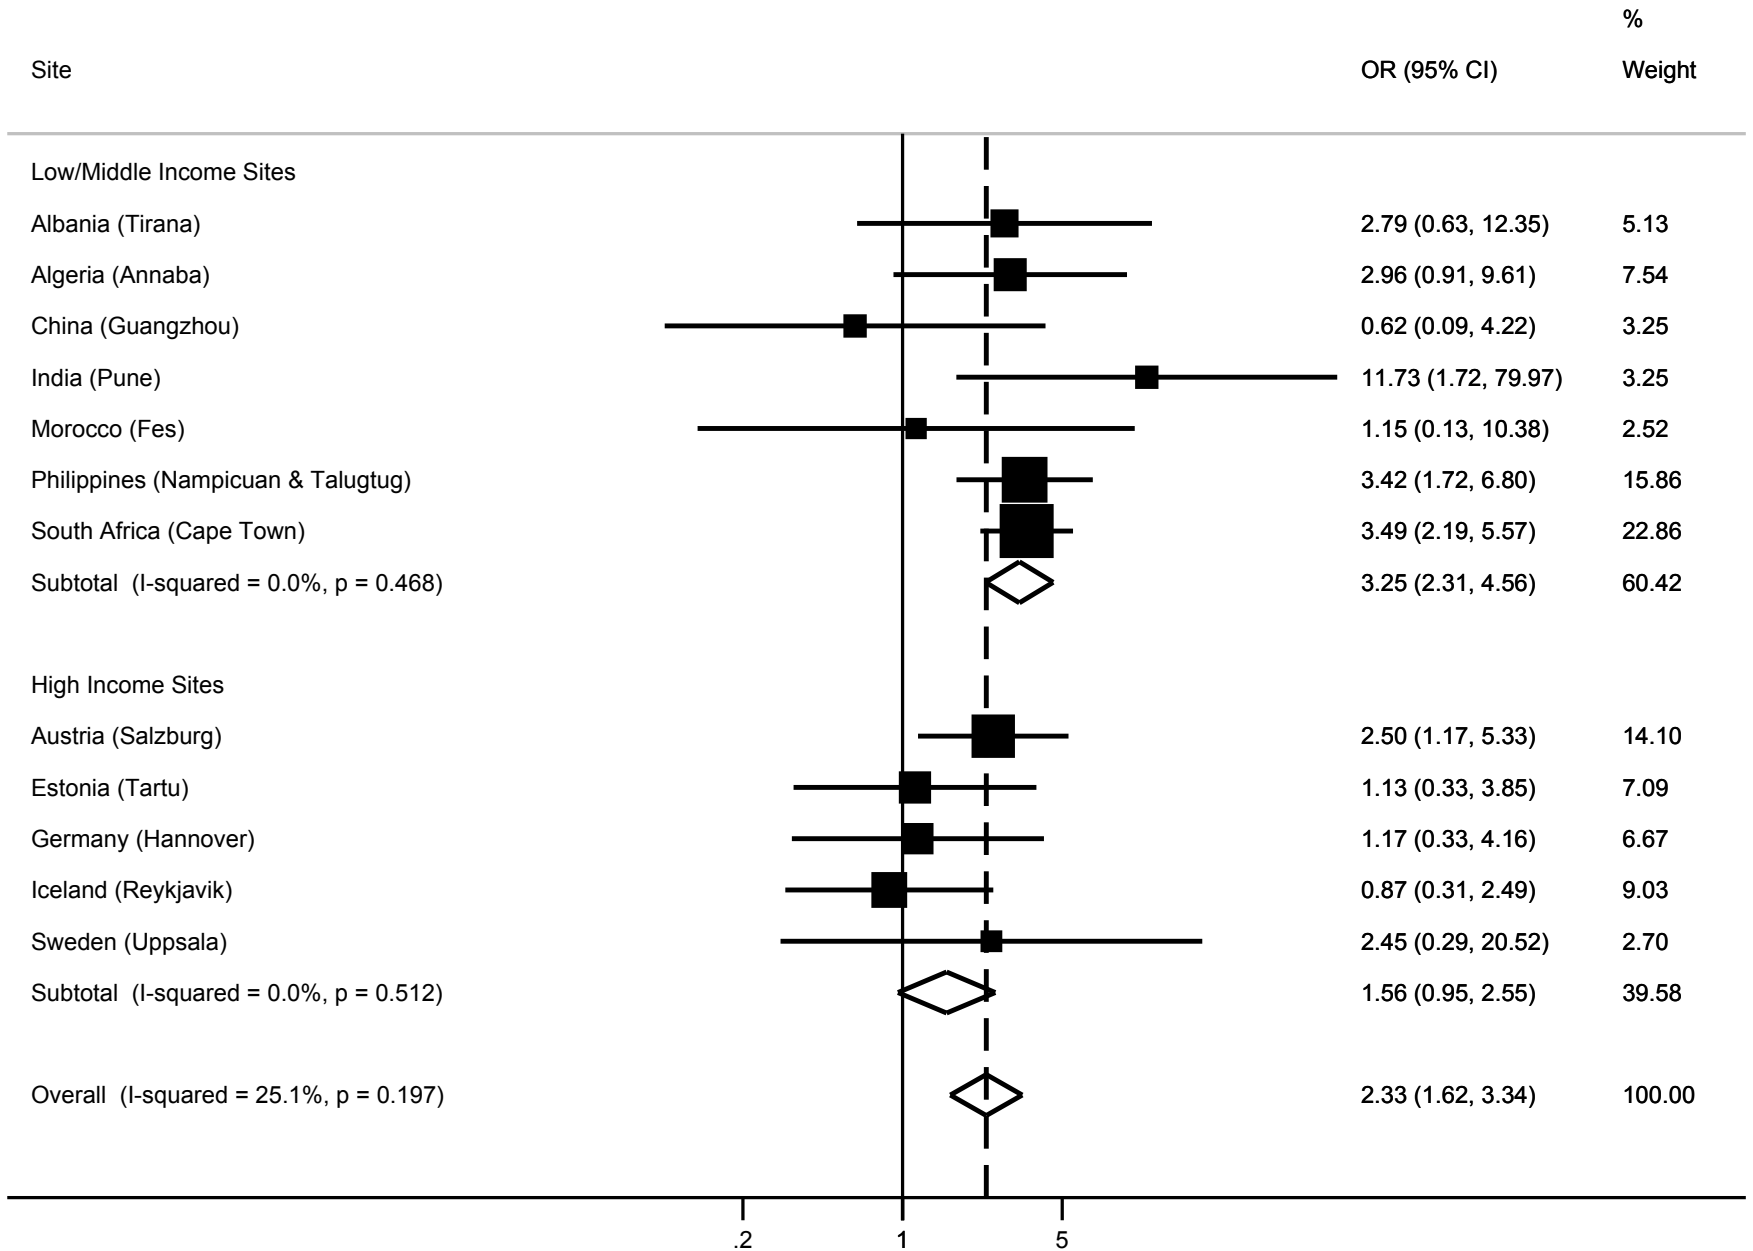

Supplement: NIHMS63343-supplement-Supplementary_figure_3.pdf [file NIHMS63343-supplement-Supplementary_figure_3.pdf]

# Association between history of tuberculosis and spirometric restriction (Cooperation rate > 60%)

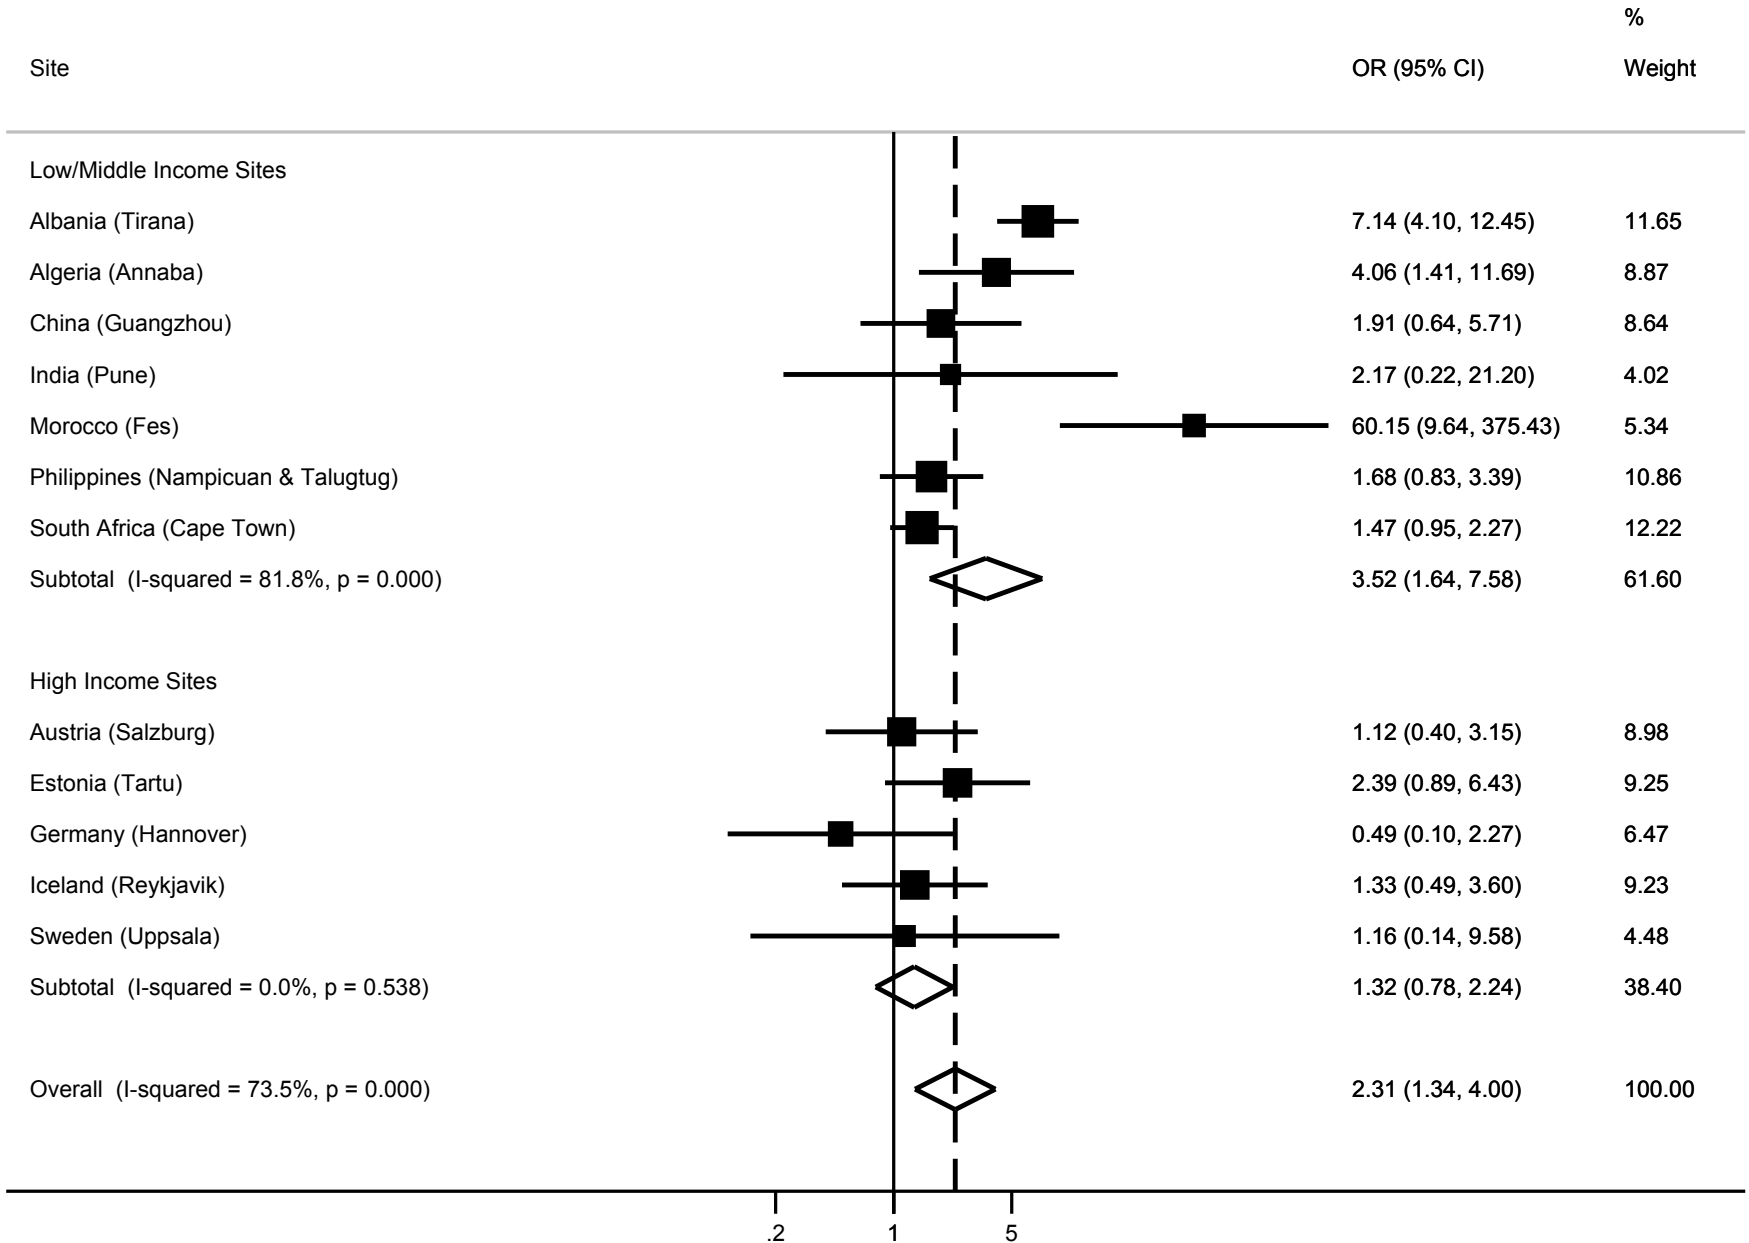

Supplement: NIHMS63343-supplement-Supplementary_figure_4.pdf [file NIHMS63343-supplement-Supplementary_figure_4.pdf]

# Association between history of tuberculosis and FEV1/FVC (Cooperation rate > 60%)

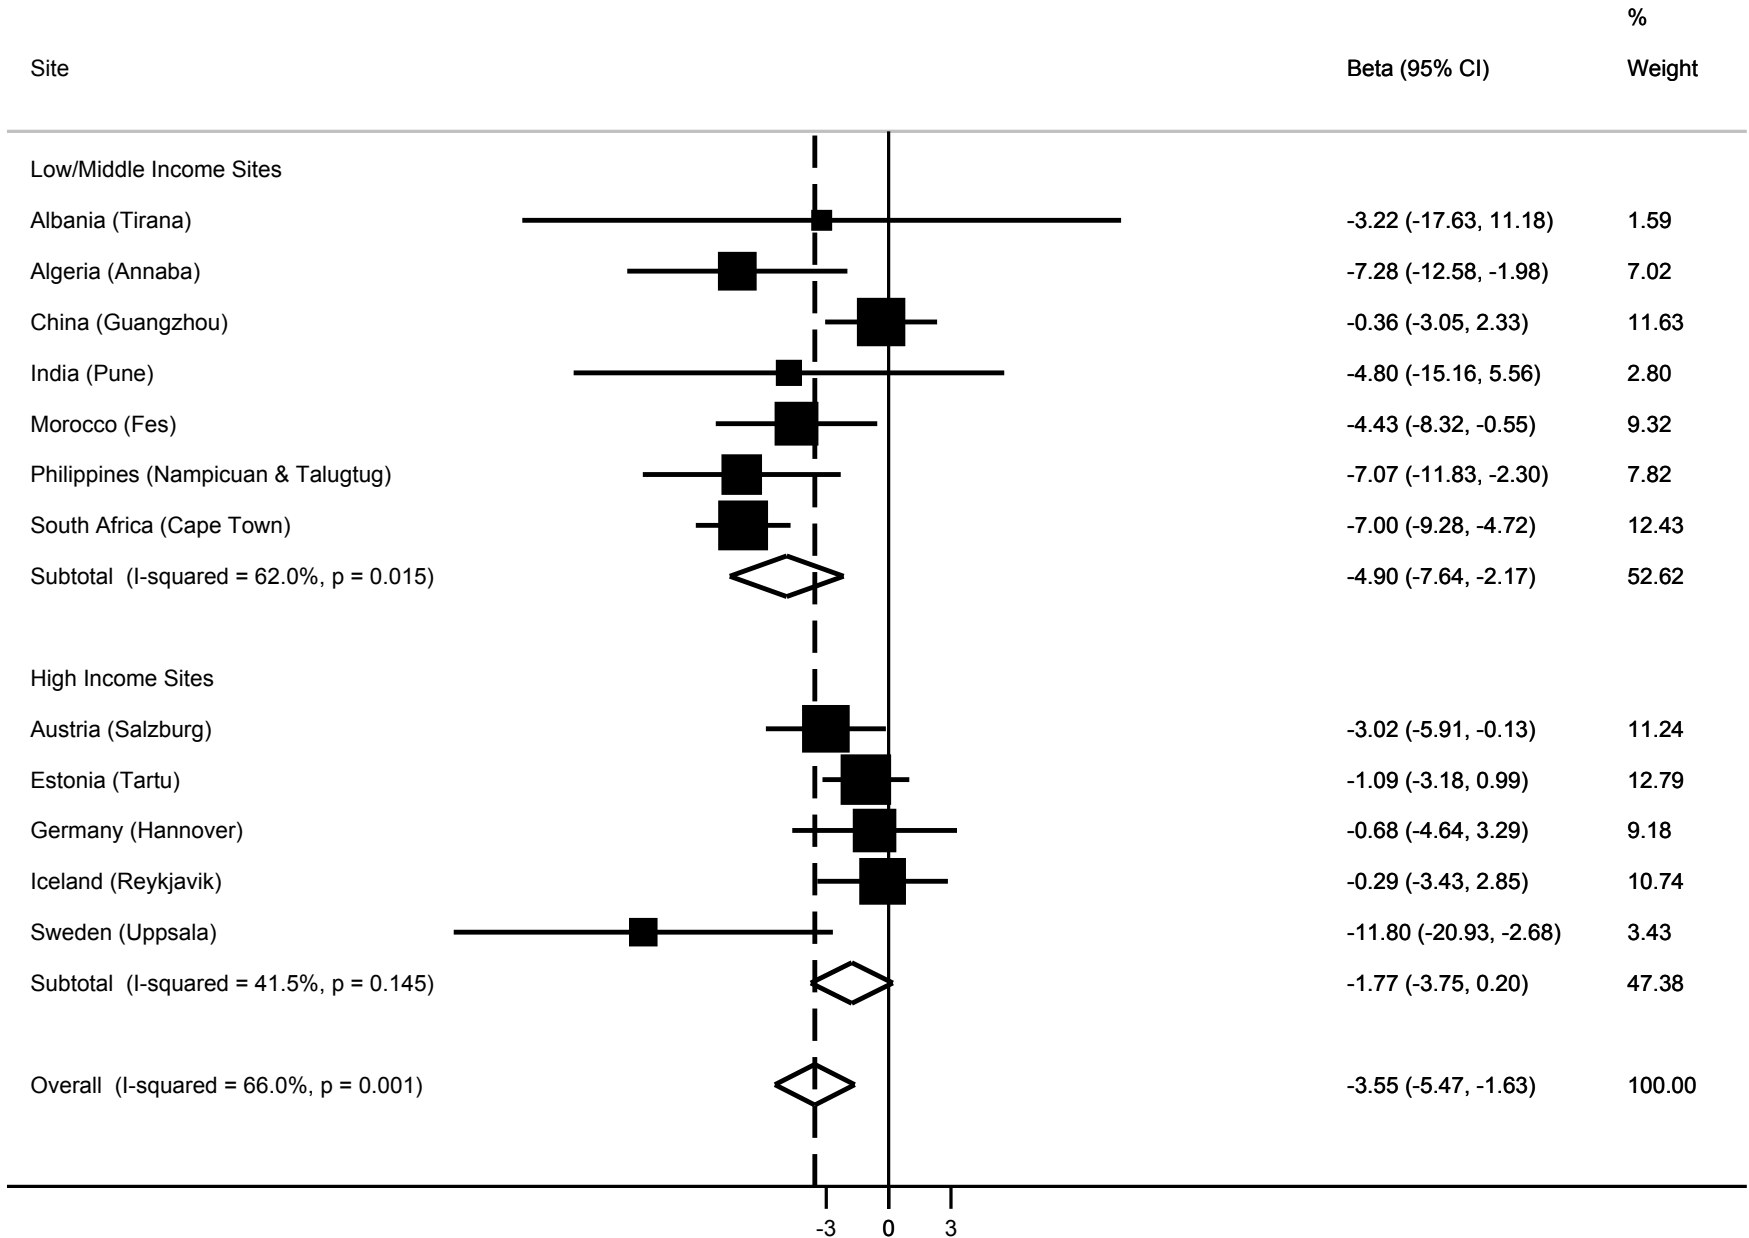

Supplement: NIHMS63343-supplement-Supplementary_figure_5.pdf [file NIHMS63343-supplement-Supplementary_figure_5.pdf]

# Association between history of tuberculosis and FVC (Cooperation rate > 60%)

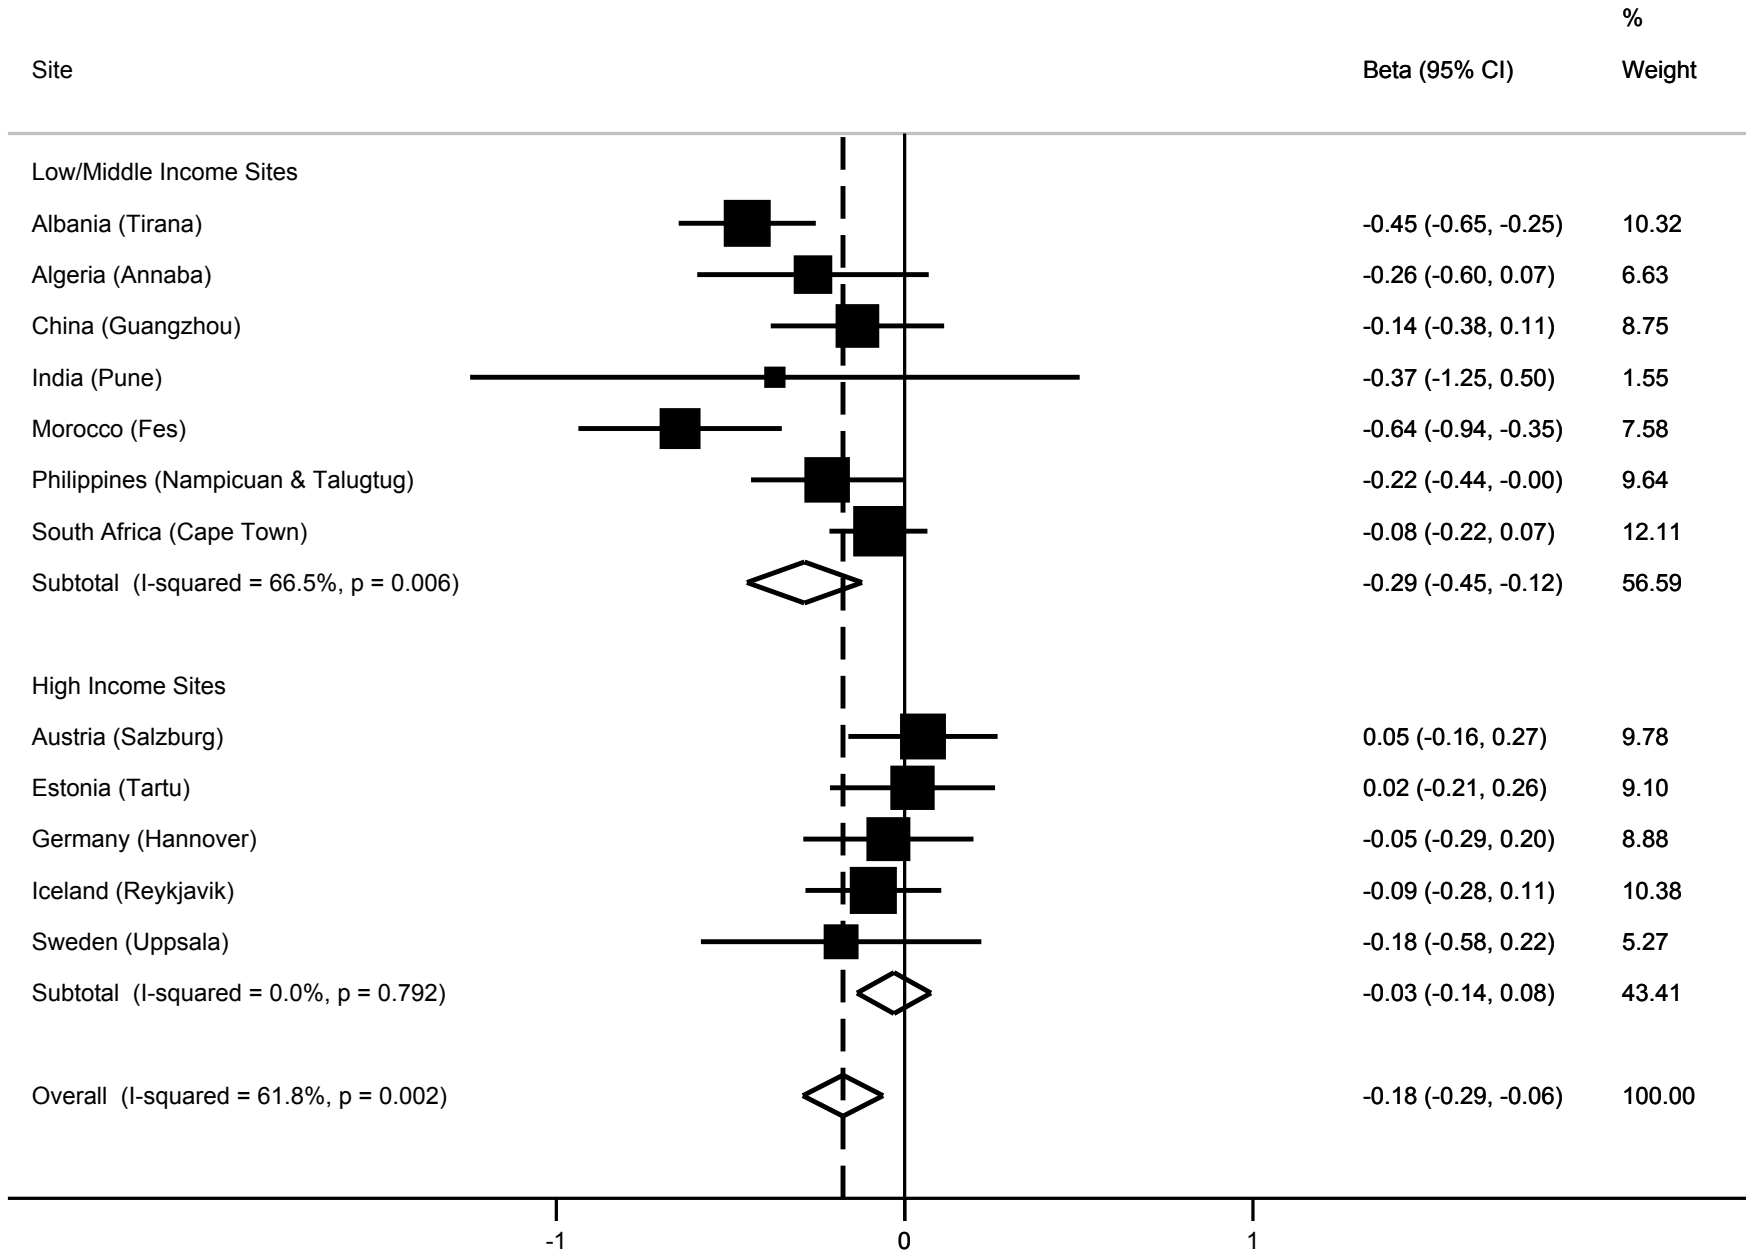

Supplement: NIHMS63343-supplement-Supplementary_figure_6.pdf [file NIHMS63343-supplement-Supplementary_figure_6.pdf]
